# Supplementary material for: Knowledge, attitude, and practice of frailty management among clinical nurses: A cross-sectional study
Source: Research Square preprint supplement (doi:10.21203/rs.3.rs-4964355/v1), 2024-11-25
Supplement: Supplementary file 1 [file 9d5703ba92e1540aadd1ee16.docx]

**Supplementary File 1**

**Knowledge, attitude, and practice questionnaire regarding frailty for nurses**

**Part 1. Knowledge**

**Please answer the following questions and circle the answer that you think is correct.**

**Part 1.1 Subjective part**

**1. Do you know the concept of frailty?**

A. I know.

B. I know a little, but not exactly.

C. I don't know.

**2. Do you know the clinical signs of frailty?**

A. I know.

B. I know a little, but not exactly.

C. I don't know.

**3. Do you know how frailty is diagnosed?**

A. I know.

B. I know a little, but not exactly.

C. I don't know.

**4. Do you know how to evaluate a frailty patient?**

A. I know.

B. I know a little, but not exactly.

C. I don't know.

**5. Do you know what the risk factors for frailty are?**

A. I know.

B. I know a little, but not exactly.

C. I don't know.

**6. Do you know what the preventive measures for frailty are?**

A. I know.

B. I know a little, but not exactly.

C. I don't know.

**Part 1.2 Objective part**

**7. Frailty is the most common risk factor for declining physical function and incapacitation.**

A. Correct

B. Wrong

C. Uncertain

**8. Frailty increases the rate of re-morbidity, and unplanned re-hospitalization, increases pain, and reduces the quality of life of patients.**

A. Correct

B. Wrong

C. Uncertain

**9. Internationally recognized methods of assessment are the Fired Diagnostic Criteria for Frailty and Frailty Index (FI)of accumulative deficits.**

A. Correct

B. Wrong

C. Uncertain

**10. The clinical manifestations of frailty patients are mainly fatigue and a sense of resistance; decreased free movement; coexistence of multiple illnesses; and weight loss, with >10% weight loss in 1 year.**

A. Correct

B. Wrong

C. Uncertain

**11. Early identification, intervention, and prevention of the progression of frailty can improve the quality of life of older persons, with significant benefits to older persons, their families, and society.**

A. Correct

B. Wrong

C. Uncertain

**12. The incidence of frailty afflictions increases with age.**

A. Correct

B. Wrong

C. Uncertain

**13. Good management of co-morbidities is one of the measures in the integrated management of frailty in old age.**

A. Correct

B. Wrong

C. Uncertain

**14. Early promotion of sound nutrition and exercise in older adults is an effective intervention to prevent or minimize senile decline.**

A. Correct

B. Wrong

C. Uncertain

**Part 2. Attitude**

**Please indicate the option that reflects your actual view of frailty management; there is no right or wrong answer. A score from 1 to 5 represents from “strongly disagree” to “strongly agree”.**

1. You believe that your knowledge of age-related frailty needs to meet clinical needs.
2. You believe that nurses should dynamically observe the frailty conditions of elderly patients.
3. You believe that nurses should receive formal training in geriatric frailty.
4. You believe that nurses should take on the role of assessing geriatric frailty care.
5. You believe that early functional exercise is important for prevention and recovery from age-related frailty.
6. Do you think healthcare professionals should pay as much attention to the prevention of age-related frailty as they do to other symptoms (e.g., DVT)?
7. You believe that there is a need to educate patients or families about geriatric frailty in your clinical practice.
8. You think that the frailty condition of older patients should be included in the clinical work of handoffs.

**Part 3. Practice**

**Please indicate the option that reflects your actual situation in cardiovascular surgical nursing practice, and there is no correct or wrong answer. A score from 1 to 5 represents from “never” to “always”.**

1. Do you proactively focus on patients' frailty conditions in your clinical work?
2. Do you communicate with patients about limb muscle strength in clinical practice?
3. Do you conduct frailty assessments of older patients in your clinical work?
4. Do you promptly report the patient's frailty condition to the physician?
5. Do you provide effective early functional exercise for older patients?
6. Do you instruct family members and help patients to do appropriate activities to relieve symptoms such as weakness?
7. Do you evaluate your patients promptly after early activity?
8. Do you evaluate your patients following nutritional interventions?
9. Are you working on frailty knowledge in the course of your job?
